# Supplementary material
Source: PubMed Central journal article supplement (PMC2737336)

## Supplementary Information

**Table S1.** Percentage of oxidized product ions observed in the CID spectrum of the doubly charged ion of the oxidized OVA peptide (M+O+2H)<sup>2+</sup>.

| Product Ion     | m/z <sub>unoxidized</sub> <sup>a</sup> | m/z <sub>oxidized</sub> <sup>a</sup> | Percentage oxidized <sup>b,c</sup> |
|-----------------|----------------------------------------|--------------------------------------|------------------------------------|
| y <sub>3</sub>  | 303                                    | 319                                  | 0                                  |
| y <sub>4</sub>  | 432                                    | 448                                  | 0                                  |
| y <sub>5</sub>  | 546                                    | 562                                  | 0                                  |
| y <sub>6</sub>  | 659                                    | 675                                  | 0                                  |
| y <sub>7</sub>  | 788                                    | 804                                  | 0                                  |
| y <sub>8</sub>  | 859                                    | 875                                  | 0                                  |
| y <sub>9</sub>  | 996                                    | 1012                                 | 22 ± 7                             |
| y <sub>10</sub> | 1067                                   | 1083                                 | 63 ± 0.4                           |
| y <sub>11</sub> | 1138                                   | 1154                                 | 69 ± 1                             |
| y <sub>12</sub> | 1275                                   | 1291                                 | 100                                |
| y <sub>13</sub> | 1374                                   | 1390                                 | 100                                |
| y <sub>14</sub> | 1445                                   | 1461                                 | 100                                |
| b <sub>5</sub>  | 499                                    | 515                                  | 0                                  |
| b <sub>6</sub>  | 636                                    | 652                                  | 17 ± 1                             |
| b <sub>7</sub>  | 707                                    | 723                                  | 25 ± 2                             |
| b <sub>8</sub>  | 778                                    | 794                                  | 38 ± 2                             |
| b <sub>9</sub>  | 915                                    | 931                                  | 100                                |
| b <sub>10</sub> | 986                                    | 1002                                 | 100                                |
| b <sub>11</sub> | 1115                                   | 1131                                 | 100                                |
| b <sub>12</sub> | 1228                                   | 1244                                 | 100                                |
| b <sub>13</sub> | 1342                                   | 1358                                 | 100                                |
| b <sub>14</sub> | 1471                                   | 1487                                 | 100                                |
| b <sub>15</sub> | 1542                                   | 1558                                 | 100                                |
| b <sub>16</sub> | 1599                                   | 1615                                 | 100                                |

<sup>a</sup> These m/z ratios correspond to the nominal m/z ratio of the observed product ions.

<sup>b</sup> The percentage oxidized is obtained by dividing the ion abundance of the oxidized product ion by the sum of the oxidized and unoxidized product ions.

<sup>c</sup> The error associated with oxidized percentage value corresponds to the standard deviation from at least three separate measurements

**Table S2.** Percentage of oxidized product ions observed in the CID spectrum of the doubly charged ion of the oxidized  $\beta$ -amyloid peptide  $(M+O+2H)^{2+}$ .

| Product Ion                   | $m/z_{\text{unoxidized}}^a$ | $m/z_{\text{oxidized}}^a$ | Percentage oxidized <sup>b,c</sup> |
|-------------------------------|-----------------------------|---------------------------|------------------------------------|
| y <sub>2</sub>                | 313                         | 329                       | 10 ± 2                             |
| y <sub>3</sub>                | 412                         | 428                       | 0                                  |
| y <sub>5</sub>                | 653                         | 669                       | 0                                  |
| y <sub>6</sub>                | 781                         | 797                       | 0                                  |
| y <sub>7</sub>                | 918                         | 934                       | 55.0 ± 0.7                         |
| y <sub>8</sub>                | 1055                        | 1071                      | 100                                |
| y <sub>9</sub>                | 1154                        | 1170                      | 100                                |
| y <sub>9</sub> <sup>2+</sup>  | 578                         | 586                       | 100                                |
| b <sub>2</sub>                | 293                         | 309                       | 14 ± 1                             |
| b <sub>3</sub>                | 392                         | 408                       | 28 ± 1                             |
| b <sub>4</sub>                | 529                         | 545                       | 45 ± 3                             |
| b <sub>5</sub>                | 666                         | 682                       | 83.0 ± 0.4                         |
| b <sub>6</sub>                | 794                         | 810                       | 78 ± 1                             |
| b <sub>7</sub>                | 922                         | 938                       | 73 ± 1                             |
| b <sub>8</sub>                | 1035                        | 1051                      | 54 ± 2                             |
| b <sub>9</sub>                | 1134                        | 1150                      | 85 ± 1                             |
| b <sub>9</sub> <sup>2+</sup>  | 567                         | 575                       | 88 ± 3                             |
| b <sub>10</sub> <sup>2+</sup> | 641                         | 649                       | 83 ± 1                             |

<sup>a</sup> These  $m/z$  ratios correspond to the nominal  $m/z$  ratio of the observed product ions.

<sup>b</sup> The percentage oxidized is obtained by dividing the ion abundance of the oxidized product ion by the sum of the oxidized and unoxidized product ions.

<sup>c</sup> The error associated with oxidized percentage value corresponds to the standard deviation from at least three separate measurements.

**Table S3.** Percentage of oxidized product ions observed in the CID spectrum of the triply charged ion of the oxidized MPP peptide (M+O+3H)<sup>3+</sup>.

| <b>Product Ion</b>            | <b>m/z<sub>unoxidized</sub><sup>a</sup></b> | <b>m/z<sub>oxidized</sub><sup>a</sup></b> | <b>Percentage oxidized<sup>b,c</sup></b> |
|-------------------------------|---------------------------------------------|-------------------------------------------|------------------------------------------|
| y <sub>2</sub>                | 294                                         | 310                                       | 0                                        |
| y <sub>5</sub> <sup>2+</sup>  | 322                                         | 330                                       | 20±0.5                                   |
| y <sub>6</sub>                | 700                                         | 716                                       | 40±0.8                                   |
| y <sub>7</sub>                | 813                                         | 829                                       | 41±1.1                                   |
| y <sub>11</sub> <sup>2+</sup> | 649                                         | 657                                       | 63±0.9                                   |
| b <sub>2</sub>                | 225                                         | 241                                       | 11±0.2                                   |
| b <sub>5</sub>                | 523                                         | 539                                       | 47±0.4                                   |
| b <sub>8</sub>                | 879                                         | 895                                       | 61±1.5                                   |
| b <sub>9</sub>                | 1016                                        | 1032                                      | 100                                      |
| b <sub>11</sub> <sup>2+</sup> | 615                                         | 623                                       | 100                                      |
| b <sub>12</sub> <sup>2+</sup> | 679                                         | 687                                       | 100                                      |
| b <sub>12</sub> <sup>3+</sup> | 453                                         | 458                                       | 100                                      |

<sup>a</sup> These m/z ratios correspond to the nominal m/z ratio of the observed product ions.

<sup>b</sup> The percentage oxidized is obtained by dividing the ion abundance of the oxidized product ion by the sum of the oxidized and unoxidized product ions.

<sup>c</sup> The error associated with oxidized percentage value corresponds to the standard deviation from at least three separate measurements

**Figure S1.** MS<sup>3</sup> of the y<sub>4</sub>+O product ion of oxidized angiotensin I (M+O+2H)<sup>2+</sup>, which helps confirm that oxidation only occurs at His9 and not Pro7 or Phe8. The asterisks indicate the product ions that are oxidized.

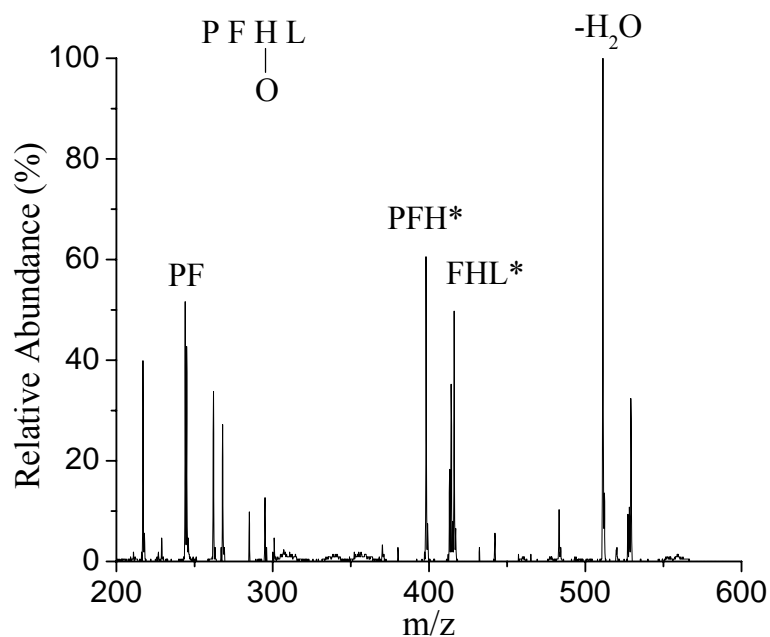

**Figure S2.** MS<sup>3</sup> of the (b<sub>9</sub>+O)<sup>2+</sup> product ion of oxidized angiotensin I (M+O+2H)<sup>2+</sup>, which helps confirm that oxidation only occurs at His6 and His9 and not Pro7 or Phe8. The asterisks indicate the product ions that are oxidized.

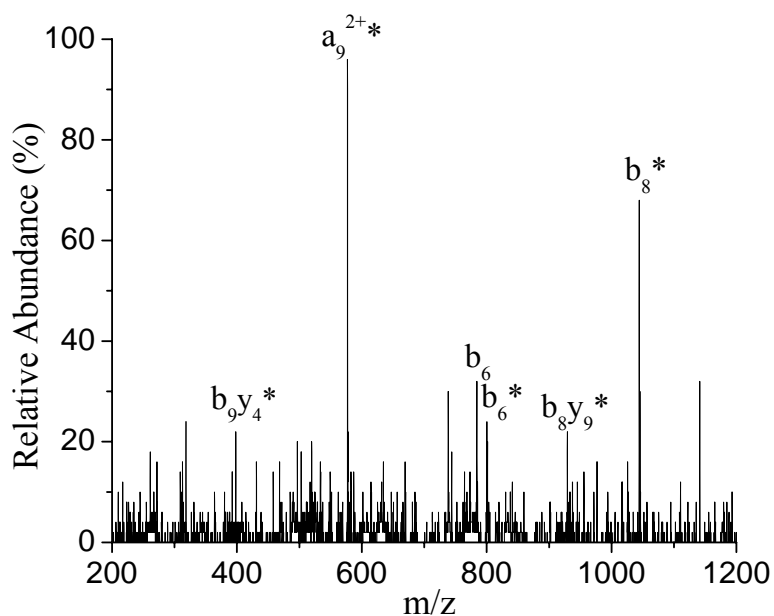

**Figure S3.** MS<sup>3</sup> of the b<sub>8</sub>+O product ion of oxidized angiotensin I (M+O+2H)<sup>2+</sup>, which helps confirm that oxidation only occurs at His6 and His9 and not Pro7 or Phe8. The asterisks indicate the product ions that are oxidized.

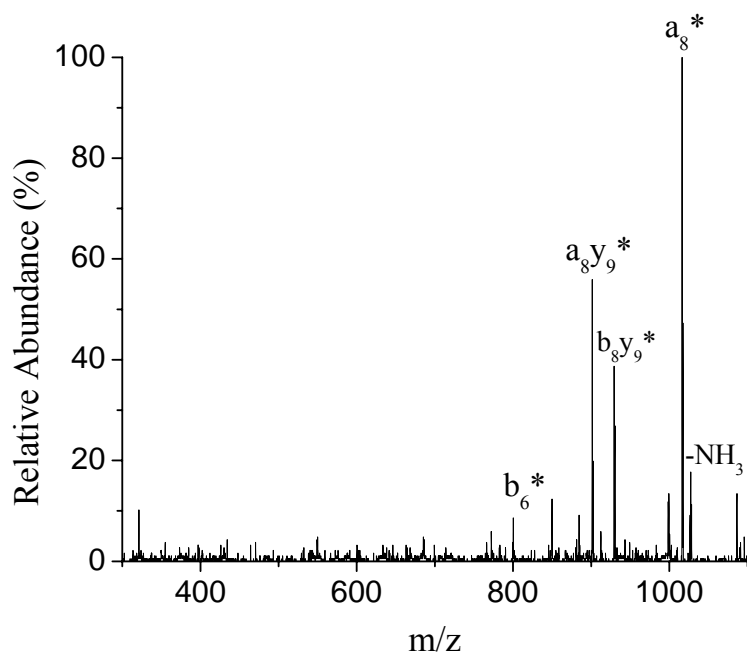

**Figure S4.** (a) CID of His9-oxidized angiotensin I (M+O+2H)<sup>2+</sup>. (b) CID of His6-oxidized angiotensin I (M+O+2H)<sup>2+</sup>. The individual oxidized His6 and oxidized His9 isomers were obtained by separating them by HPLC. The asterisks indicate the product ions that are oxidized.

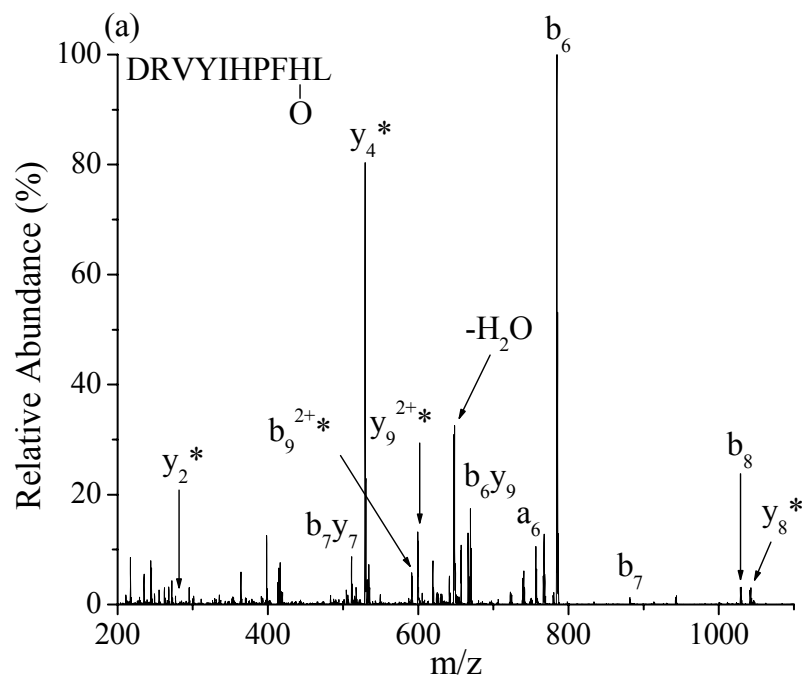

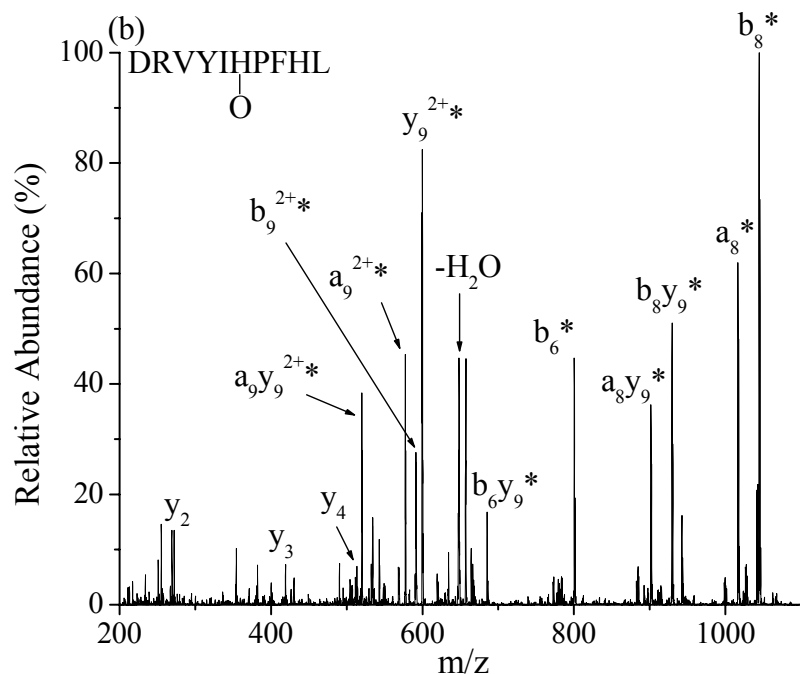

**Figure S5.** (a) CID of His6-oxidized OVA peptide (M+O+2H)<sup>2+</sup> (b) CID of His9-oxidized OVA peptide (M+O+2H)<sup>2+</sup>. The individual oxidized His6 and oxidized His9 isomers were obtained by separating them by HPLC. The asterisks indicate the product ions that are oxidized.

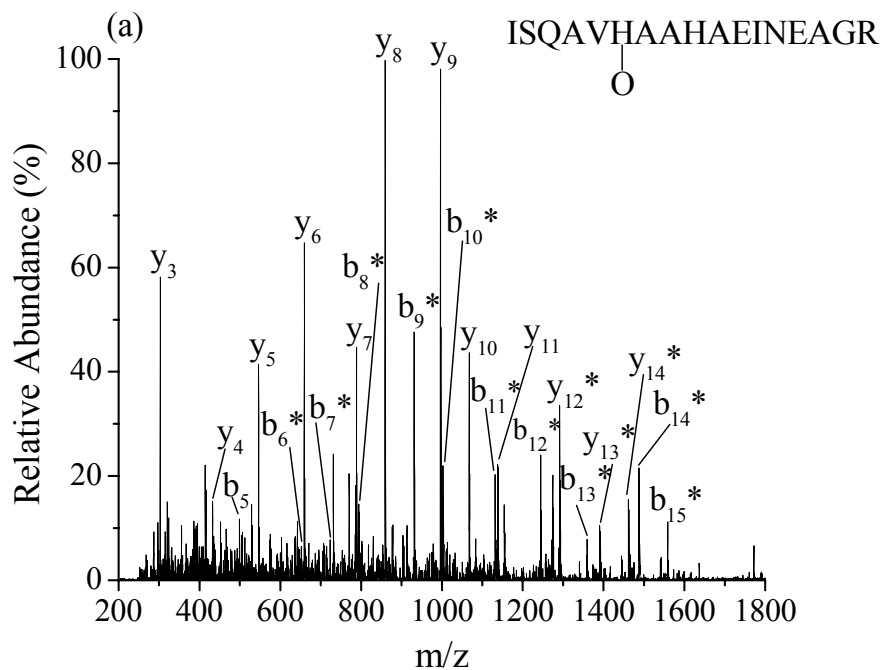

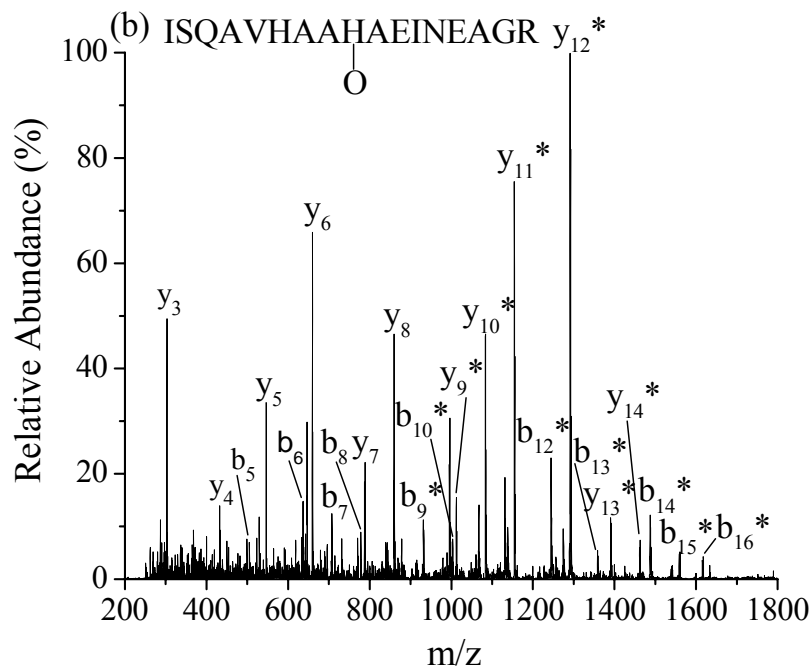

**Figure S6.** ETD of the triply-charged ion of oxidized OVA peptide ( $M+O+3H$ )<sup>3+</sup> without prior LC separation. The asterisks indicate the product ions that are oxidized.

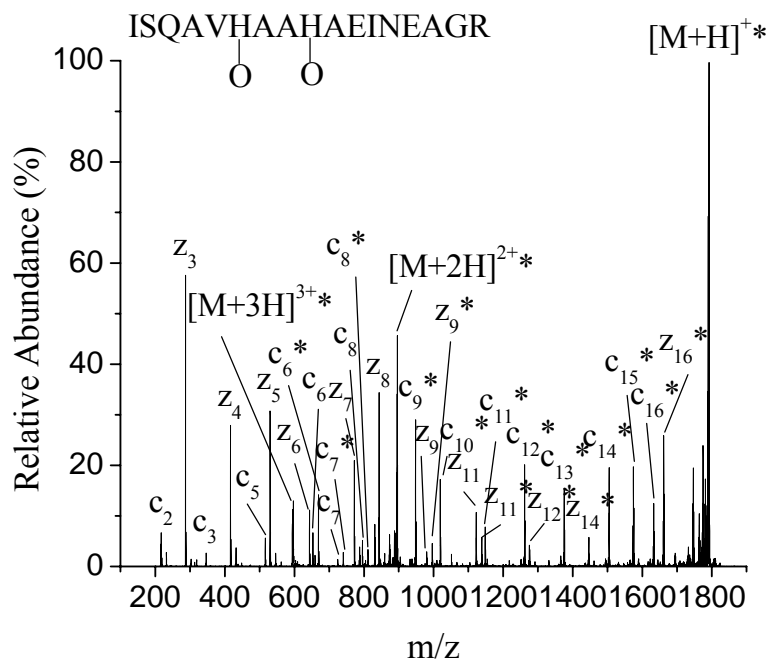

**Figure S7.** (a) CID of His4-oxidized  $\beta$ -amyloid peptide ( $M+O+2H$ )<sup>2+</sup>. (b) CID of His5-oxidized  $\beta$ -amyloid peptide ( $M+O+2H$ )<sup>2+</sup>. (c) CID of Phe10-oxidized  $\beta$ -amyloid peptide ( $M+O+2H$ )<sup>2+</sup>. (d) CID of Phe11-oxidized  $\beta$ -amyloid peptide ( $M+O+2H$ )<sup>2+</sup>. The individual oxidized isomers were obtained by separating them by HPLC. The asterisks indicate the product ions that are oxidized.

(a)

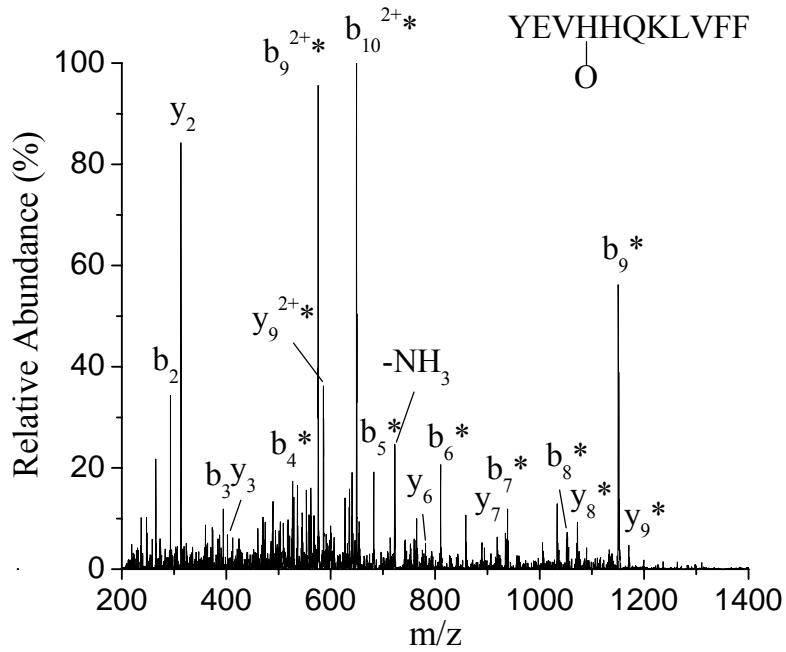

(b)

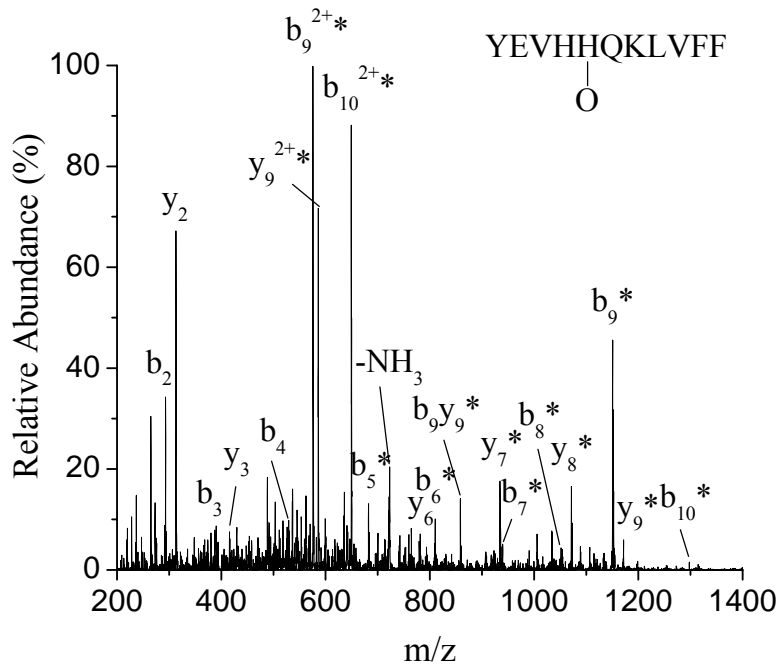



(c)

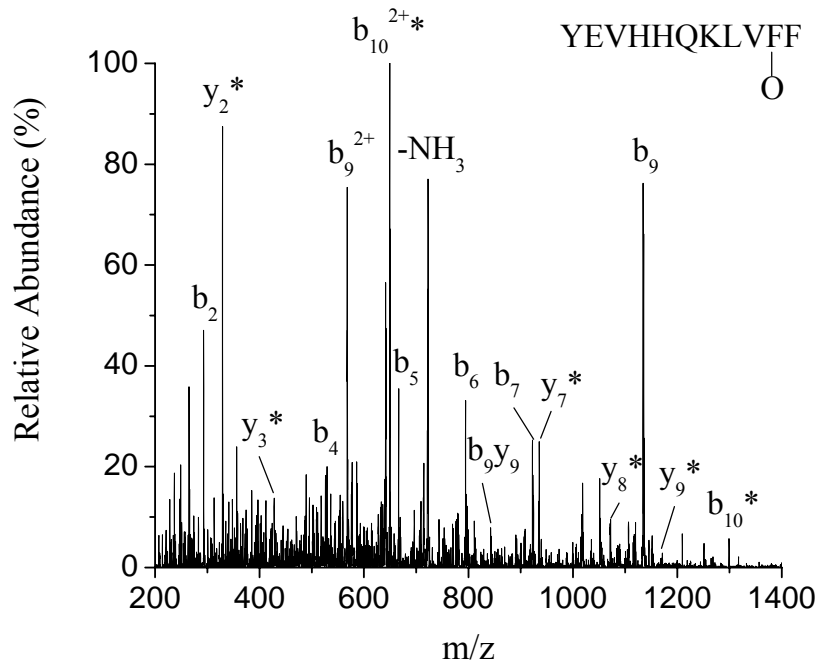

(d)

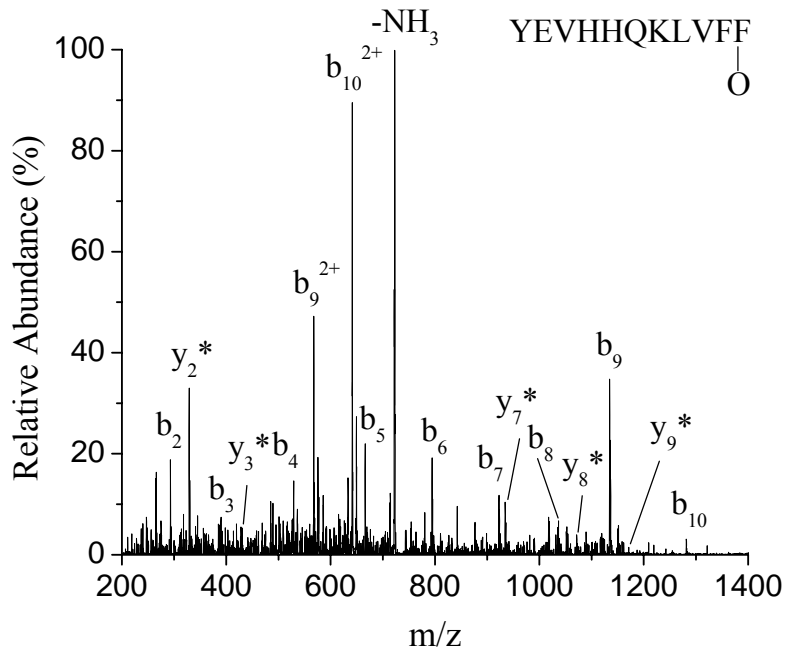

**Figure S8.** ETD of the triply-charged ion of oxidized  $\beta$ -amyloid peptide ( $M+O+3H$ )<sup>3+</sup> without prior LC separation. The asterisks indicate the product ions that are oxidized.

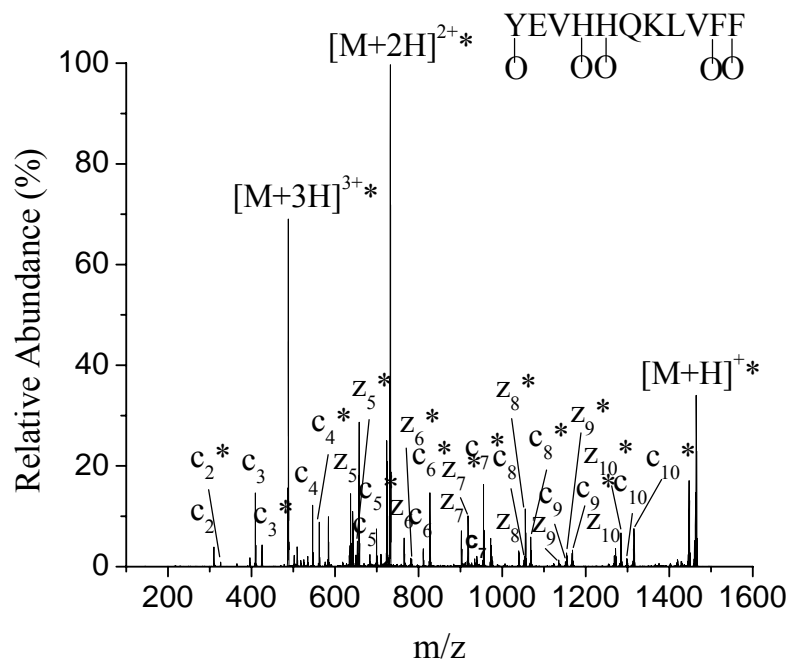

Supplement: NIHMS136224-supplement-Supp__Information.pdf [file NIHMS136224-supplement-Supp__Information.pdf]
